# Supplementary material for: Drug Therapeutic-Use Class Prediction and Repurposing Using Graph Convolutional Networks
Source: MDPI journal article supplement (doi:10.3390/pharmaceutics13111906), 2021-11-10
Supplement: s1 [file s1]

# Supplementary Materials: Drug Therapeutic-Use Class Prediction and Repurposing Using Graph Convolutional Networks

Mapopa Chipofya, Hilal Tayara and Kil To Chong

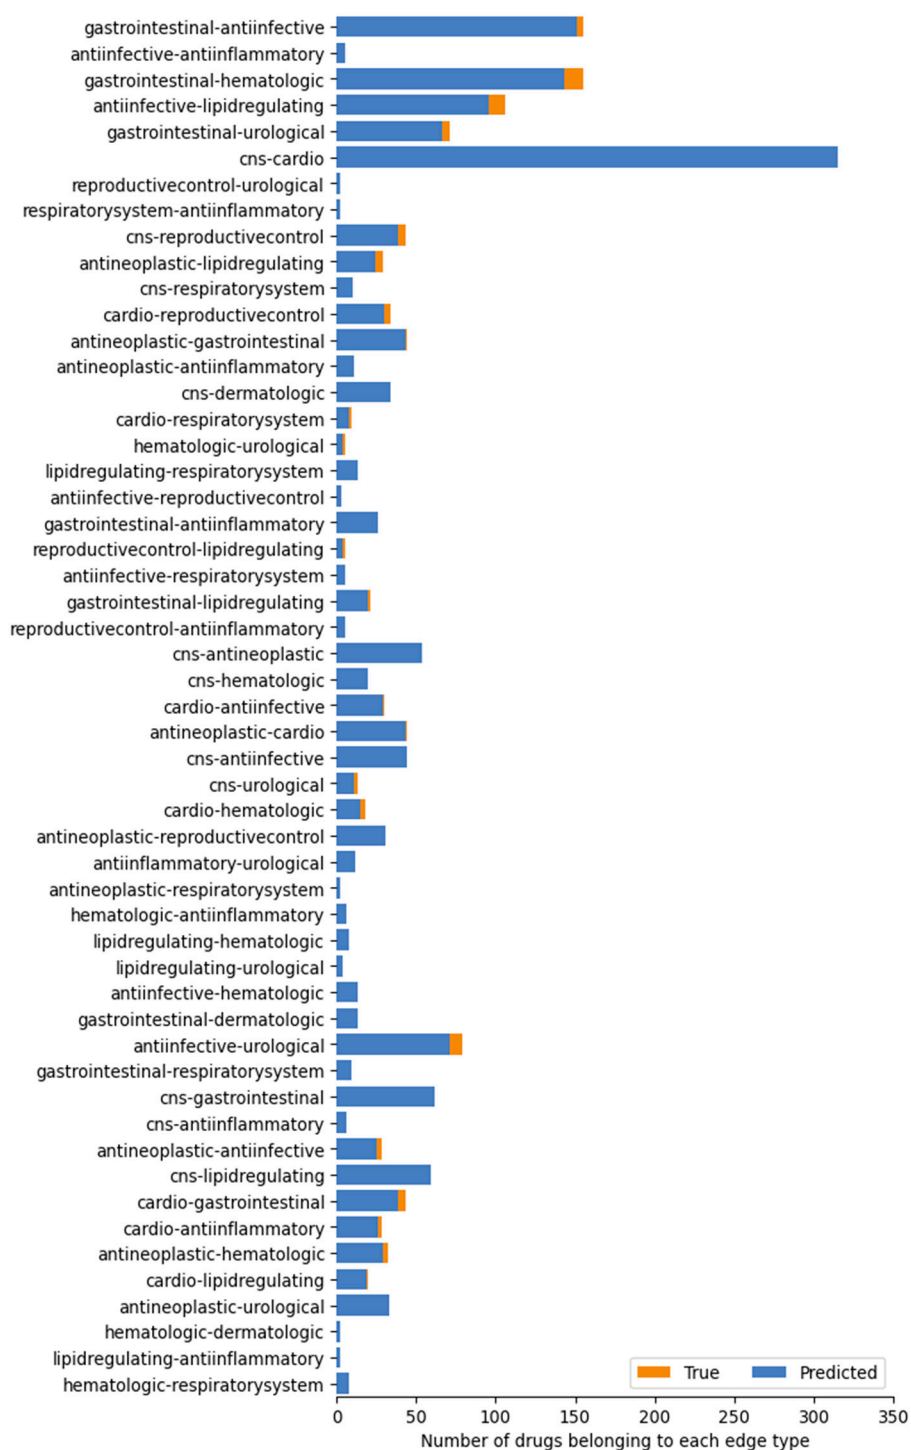

**Figure S1.** A bar plot showing the number of drugs count on each edge type. These numbers form the weights of the networks of Figure 7 in the manuscript. The exact numbers are provided in Table S1 of this supplementary file.

**Table S1.** Table showing the number of true and predicted drugs that belong to each edge type. Each edge type connects two MeSH classes to which the given and predicted number of drugs belong.

| Edge Type                            | Number of True Edges | Number of Predicted Edges |
|--------------------------------------|----------------------|---------------------------|
| gastrointestinal-antiinfective       | 155                  | 151                       |
| antiinfective-antiinflammatory       | 5                    | 5                         |
| gastrointestinal-hematologic         | 155                  | 143                       |
| antiinfective-lipidregulating        | 106                  | 96                        |
| gastrointestinal-urological          | 71                   | 66                        |
| cns-cardio                           | 315                  | 315                       |
| reproductivecontrol-urological       | 2                    | 2                         |
| respiratorysystem-antiinflammatory   | 1                    | 2                         |
| cns-reproductivecontrol              | 43                   | 39                        |
| antineoplastic-lipidregulating       | 29                   | 24                        |
| cns-respiratorysystem                | 8                    | 10                        |
| cardio-reproductivecontrol           | 34                   | 30                        |
| antineoplastic-gastrointestinal      | 44                   | 43                        |
| antineoplastic-antiinflammatory      | 11                   | 11                        |
| cns-dermatologic                     | 6                    | 34                        |
| cardio-respiratorysystem             | 9                    | 8                         |
| hematologic-urological               | 5                    | 4                         |
| lipidregulating-respiratorysystem    | 13                   | 13                        |
| antiinfective-reproductivecontrol    | 3                    | 3                         |
| gastrointestinal-antiinflammatory    | 26                   | 26                        |
| reproductivecontrol-lipidregulating  | 5                    | 4                         |
| antiinfective-respiratorysystem      | 4                    | 5                         |
| gastrointestinal-lipidregulating     | 21                   | 20                        |
| reproductivecontrol-antiinflammatory | 5                    | 5                         |
| cns-antineoplastic                   | 50                   | 54                        |
| cns-hematologic                      | 18                   | 20                        |
| cardio-antiinfective                 | 30                   | 29                        |
| antineoplastic-cardio                | 44                   | 43                        |
| cns-antiinfective                    | 40                   | 44                        |
| cns-urological                       | 13                   | 11                        |
| cardio-hematologic                   | 18                   | 15                        |
| antineoplastic-reproductivecontrol   | 31                   | 31                        |
| antiinflammatory-urological          | 12                   | 12                        |
| antineoplastic-respiratorysystem     | 1                    | 2                         |
| hematologic-antiinflammatory         | 5                    | 6                         |
| lipidregulating-hematologic          | 7                    | 8                         |
| lipidregulating-urological           | 4                    | 4                         |
| antiinfective-hematologic            | 11                   | 13                        |
| gastrointestinal-dermatologic        | 11                   | 13                        |
| antiinfective-urological             | 79                   | 71                        |
| gastrointestinal-respiratorysystem   | 9                    | 9                         |
| cns-gastrointestinal                 | 55                   | 62                        |
| cns-antiinflammatory                 | 6                    | 6                         |
| antineoplastic-antiinfective         | 28                   | 25                        |
| cns-lipidregulating                  | 57                   | 59                        |
| cardio-gastrointestinal              | 43                   | 39                        |
| cardio-antiinflammatory              | 28                   | 26                        |
| antineoplastic-hematologic           | 32                   | 29                        |

|                                  |    |    |
|----------------------------------|----|----|
| cardio-lipidregulating           | 20 | 19 |
| antineoplastic-urological        | 33 | 33 |
| hematologic-dermatologic         | 1  | 2  |
| lipidregulating-antiinflammatory | 2  | 2  |
| hematologic-respiratorysystem    | 8  | 8  |
